# Supplementary material
Source: publisher figshare collection journal article supplement (https://gsajournals.figshare.com/ndownloader/files/16689947)
Supplement: Supplementary file 1 [file 16689947]

# Supplementary Materials

QTG-Finder: a machine-learning based algorithm to prioritize  
causal genes of quantitative trait loci in Arabidopsis and rice

**Fan Lin, Jue Fan, Seung Y. Rhee\***

Department of Plant Biology, Carnegie Institution for Science, Stanford, California 94305, USA

Contact: [srhee@carnegiescience.edu](mailto:srhee@carnegiescience.edu)  
[flin@carnegiescience.edu](mailto:flin@carnegiescience.edu)

## List of Contents

### Supplementary Methods

**Supplementary Table S1** Curated Arabidopsis causal genes used for model training and cross-validation

**Supplementary Table S2** Curated rice causal genes used for model training and cross-validation

**Supplementary Table S3** Causal gene features and their frequency and value in causal genes and the genome background

**Supplementary Table S4** Features used for the Arabidopsis model

**Supplementary Table S5** Features used for the rice model

**Supplementary Table S6** Confusion matrix based on cross-validation analysis

**Supplementary Table S7** The change of AUC-ROC when removing each feature

**Supplementary Table S8** Evaluating model performance based on the rank of an independent set of known causal genes

**Supplementary Fig. S1** Comparing ROC curves of classifiers

**Supplementary Fig. S2** Random Forest hyperparameters

**Supplementary Fig. S3** The ratio of positives:negatives in training set

**Supplementary Fig. S4** Correlations among features

**Supplementary Fig. S5** Different methods for generating GO features

**Supplementary Fig. S6** The relationship between training performance and the number of training positives used

### References

## **Supplementary Methods**

### **Curation of causal genes for training and cross-validation**

We curated the causal genes (Supplementary Tables S1 and S2) based on the list of causal alleles in (Martin and Orgogozo 2013). The curated causal genes only included genes whose molecular identity was found (cloned). Alleles of the same causal genes identified from different parental lines were merged into one causal gene entry for training. Since only gene names were available for these causal genes in the original list (Martin and Orgogozo 2013), we searched the literature to find gene IDs associated with sequences. When the gene ID was not provided in the literature, we obtained the sequence of the gene from GenBank (<https://www.ncbi.nlm.nih.gov/genbank/>) or UniProt (<https://www.uniprot.org>) and performed BLAST against the Arabidopsis Information Resource (<https://www.arabidopsis.org/Blast/>) or the MSU Rice Genome Annotation Project Database ([http://rice.plantbiology.msu.edu/analyses\\_search\\_blast.shtml](http://rice.plantbiology.msu.edu/analyses_search_blast.shtml)) to get the gene IDs.

### **Curation of causal genes for independent validation**

For literature validation, we performed a further literature curation and found eleven Arabidopsis and eighteen rice causal genes, which were not included in the Martin and Orgogozo list. It included causal genes that have been cloned or indicated by joint linkage-association analysis or indicated by genetic analyses (Sato *et al.* 1999; Sharma *et al.* 2005; Barth and Jander 2006; Bennett *et al.* 2006; Riefler *et al.* 2006; Ehrenreich *et al.* 2007; Qiu *et al.* 2007; Hu *et al.* 2008; Qi *et al.* 2008; Itoh *et al.* 2010; Rai *et al.* 2011; Huang *et al.* 2012; Chardon *et al.* 2013; Zeng *et al.* 2013; Fukuoka *et al.* 2014; Motte *et al.* 2014; Conte *et al.* 2015; Dixit *et al.* 2015; Guo *et al.* 2015; Oikawa *et al.* 2015; Azizi *et al.* 2016; Fan *et al.* 2016; Gao *et al.* 2016; Yuan *et al.* 2016; Liu *et al.* 2017).

## Supplementary Tables

**Supplementary Table S1 Curated Arabidopsis causal genes used for model training and cross-validation.**

| Gene Name                         | Gene ID   | Gene Function                       | Trait                                        | Trait category          | Reference PMID                         |
|-----------------------------------|-----------|-------------------------------------|----------------------------------------------|-------------------------|----------------------------------------|
| APR2                              | AT1G62180 | enzyme                              | shoot sulfate content                        | abiotic stress response | 17589509                               |
| ACD6                              | AT4G14400 | membrane protein                    | leaf initiation and necrosis                 | development             | 20520716, 20336072                     |
| AOP3                              | AT4G03050 | enzyme                              | glucosinolate accumulation                   | biotic stress response  | 11251105, 19737743, 21857804           |
| AT5G41740                         | AT5G41740 | R-protein with leucine-rich repeats | necrosis                                     | other                   | 17803357                               |
| AT5G41750                         | AT5G41750 | R-protein with leucine-rich repeats | necrosis                                     | other                   | 17803357                               |
| AtHKT1                            | AT4G10310 | transporter ion                     | salt tolerance                               | abiotic stress response | 17140289, 21085628                     |
| Brevis radix (BRX)                | AT1G31880 | TF                                  | root length                                  | development             | 15031265                               |
| Cryptochrome 2 (CRY2) EDI allele  | AT1G04400 | chromophore protein                 | flowering time and other pleiotropic effects | development             | 11726930, 15280248, 15248119, 14605225 |
| CYCD5;1                           | AT4G37630 | cyclin-dependent kinase             | cell division                                | development             | 22392991                               |
| CYP81F2                           | AT5G57220 | enzyme (P450)                       | glucosinolate metabolism                     | biotic stress response  | 19293369                               |
| DOG1 (DELAY OF GERMINATION 1)     | AT5G45830 | unknown                             | seed germination                             | development             | 17065317, 22231484, 20336072           |
| EARLY FLOWERING 3(ELF3)           | AT2G25930 | Circadian oscillator                | flowering                                    | development             | 20838594, 21857804, 20713464, 23129635 |
| Epithiospecifier Modifier1 (ESM1) | AT3G14210 | enzyme associated                   | glucosinolate                                | biotic stress response  | 16679459                               |
| Epithiospecifier protein (ESP)    | AT1G54040 | enzyme                              | glucosinolate                                | biotic stress response  | 11752388                               |
| ERECTA                            | AT2G26330 | receptor (RTK-LRR)                  | plant and leaf architecture, transpiration   | development             | 16007076, 20374533, 21368205           |

|                                    |           |                                                                   |                                  |                         |                                        |
|------------------------------------|-----------|-------------------------------------------------------------------|----------------------------------|-------------------------|----------------------------------------|
| FLC (Flowering Locus C)            | AT5G10140 | TF (MADS)                                                         | flowering                        | development             | 22865739                               |
| FLM (MAF1)                         | AT1G77080 | TF (MADS)                                                         | flowering                        | development             | 15695584                               |
| Flowering locus T (FT)             | AT1G65480 | RAF kinase inhibitor                                              | flowering                        | development             | 17158798                               |
| FPN2                               | AT5G03570 | transporter                                                       | nickel tolerance                 | abiotic stress response | 19861554                               |
| FRD3 (FERRIC REDUCTASE DEFECTIVE3) | AT3G08040 | transporter                                                       | iron transport                   | abiotic stress response | 23236296                               |
| Frigida (FRI)                      | AT4G00650 | nuclear regulatory protein                                        | flowering time                   | development             | 11030654, 12140238, 12805638, 15908596 |
| Frigida like 1 (FRL1)              | AT5G16320 | nuclear regulatory protein, coiled-coil domain-containing protein | flowering time                   | development             | 17056759                               |
| Frigida like 2 (FRL2)              | AT1G31814 | nuclear regulatory protein, coiled-coil domain-containing protein | flowering time                   | development             | 17056759                               |
| GIBBERELLIC ACID REQUIRING 1 (GA1) | AT4G02780 | enzyme                                                            | plant morphology (flowers)       | development             | 22510148                               |
| heavy metal atpase3 (HMA3)         | AT4G30120 | transporter                                                       | cadmium accumulation             | abiotic stress response | 22969436                               |
| heavy metal atpase4 (HMA4)         | AT2G19110 | transporter                                                       | cadmium accumulation             | abiotic stress response | 17434989, 18425111                     |
| heavy metal atpase5 (HMA5)         | AT1G63440 | transporter                                                       | copper accumulation              | abiotic stress response | 18701674                               |
| HUA2                               | AT5G23150 | Signalling RPR domain protein, putative mRNA processing factor    | flowering time, shoot morphology | development             | 17764945                               |
| KCS18                              | AT4G34520 | enzyme                                                            | oil composition                  | other                   | 23145136                               |
| MADS AFFECTING FLOWERING 2 (MAF2)  | AT5G65050 | TF (MADS)                                                         | flowering                        | development             | 20551443                               |
| MAM1                               | AT5G23010 | enzyme                                                            | glucosinolate                    | biotic stress response  | 11706188, 19737743, 21857804, 23042895 |
| metal tolerance                    | AT2G46800 | transporter                                                       | zinc concentration               | abiotic stress          | 15255871,                              |

|                                       |           |                                     |                                                                                                                    |                         |                             |
|---------------------------------------|-----------|-------------------------------------|--------------------------------------------------------------------------------------------------------------------|-------------------------|-----------------------------|
| protein1                              |           |                                     |                                                                                                                    | response                | 20419142                    |
| Molybdenum transporter1 (MOT1)        | AT2G25680 | transporter                         | molybdenum content                                                                                                 | abiotic stress response | 18454190                    |
| mucilage-modified 2 (mum2)            | AT5G63800 | enzyme                              | mucilage formation                                                                                                 | other                   | 18165330                    |
| phytochrome A (PHYA)                  | AT1G09570 | chromophore protein                 | light sensitivity                                                                                                  | development             | 11726931                    |
| phytochrome B (PHYB)                  | AT2G18790 | chromophore protein                 | light sensitivity                                                                                                  | development             | 18287016                    |
| phytochrome C (PHYC)                  | AT5G35840 | chromophore protein                 | light sensitivity                                                                                                  | development             | 16732287                    |
| phytochrome D (PHYD)                  | AT4G16250 | chromophore protein                 | light sensitivity, increased petiole length, reduced cotyledon area and anthocyanin accumulation in seedling stems | development             | 9286109                     |
| RAS1                                  | AT1G09950 | microProtein                        | salt tolerance                                                                                                     | abiotic stress response | 20212128                    |
| resistant to methyl viologen 1 (RMV1) | AT5G05630 | transporter                         | polyamine uptake                                                                                                   | abiotic stress response | 22492932                    |
| RLM1                                  | AT1G64070 | R-protein with leucine-rich repeats | pathogen resistance                                                                                                | biotic stress response  | 16623885                    |
| RLM3                                  | AT4G16990 | R-protein with leucine-rich repeats | pathogen resistance                                                                                                | biotic stress response  | 18397376                    |
| RPM1                                  | AT3G07040 | R-protein with leucine-rich repeats | pathogen resistance                                                                                                | biotic stress response  | 16623885                    |
| RPP13                                 | AT3G46530 | R-protein with leucine-rich repeats | pathogen resistance                                                                                                | biotic stress response  | 15082565                    |
| RPP4                                  | AT4G16860 | R-protein with leucine-rich repeats | pathogen resistance                                                                                                | biotic stress response  | 11846877                    |
| RPP5                                  | AT4G16950 | R-protein with leucine-rich repeats | pathogen resistance                                                                                                | biotic stress response  | 9212464, 11846877, 20479233 |
| RPP8                                  | AT5G43470 | R-protein with leucine-rich repeats | pathogen resistance                                                                                                | biotic stress response  | 9811794 , 20479233          |
| RPS2                                  | AT3G03600 | R-protein with leucine-rich repeats | pathogen resistance                                                                                                | biotic stress response  | 9874813                     |
| RPS4                                  | AT5G45250 | R-protein with leucine-rich repeats | pathogen resistance                                                                                                | biotic stress response  | 11846877                    |
| RPS5                                  | AT1G12220 | R-protein with leucine-rich repeats | pathogen resistance                                                                                                | biotic stress response  | 9212464, 11846877, 20479233 |
| RRS1                                  | AT5G45260 | R-protein with leucine-rich repeats | pathogen resistance                                                                                                | biotic stress response  | 19519800, 19686535          |
| WRR4                                  | AT1G56510 | R-protein with leucine-rich repeats | pathogen resistance                                                                                                | biotic stress response  | 18624640                    |

|                  |           |                                     |                     |                         |                       |
|------------------|-----------|-------------------------------------|---------------------|-------------------------|-----------------------|
| CBF gene cluster | AT4G25490 | TF (MADS)                           | cold resistance     | abiotic stress response | 21421342              |
| RAC1             | AT1G31540 | R-protein with leucine-rich repeats | pathogen resistance | biotic stress response  | 15242165              |
| RPP1-WsA         | AT3G44670 | R-protein with leucine-rich repeats | pathogen resistance | biotic stress response  | 9811793               |
| RPP1-WsB         | AT3G25510 | R-protein with leucine-rich repeats | pathogen resistance | biotic stress response  | 9811793               |
| RPP1-WsC         | AT3G44480 | R-protein with leucine-rich repeats | pathogen resistance | biotic stress response  | 9811793               |
| RPP2A            | AT4G19500 | R-protein with leucine-rich repeats | pathogen resistance | biotic stress response  | 15165183              |
| RPP2B            | AT4G19510 | R-protein with leucine-rich repeats | pathogen resistance | biotic stress response  | 15165183              |
| GLABROUS1        | AT3G27920 | TF (MYB)                            | trichome (leaves)   | development             | 11504855,<br>17217357 |

**Supplementary Table S2 Curated rice causal genes used for model training and cross-validation.**

| Gene name                | ID             | Gene function                                                 | Trait                                            | Trait category | Reference PMID                     |
|--------------------------|----------------|---------------------------------------------------------------|--------------------------------------------------|----------------|------------------------------------|
| Alk / Starch Synthase II | LOC_Os06g12450 | enzyme                                                        | grain cooking texture                            | other          | 12579422,<br>16027975,<br>20972439 |
| BADH2                    | LOC_Os08g32870 | enzyme                                                        | fragrance                                        | other          | 17129318, 19706531                 |
| Ehd1                     | LOC_Os10g32600 | TF                                                            | flowering time                                   | development    | 15078816                           |
| EARLY FLOWERING 3/Hd17   | LOC_Os06g05060 | Circadian oscillator                                          | flowering time                                   | development    | 22399582                           |
| Ghd7                     | LOC_Os07g15770 | TF (CO-like)                                                  | flowering time, plant morphology (inflorescence) | development    | 18454147                           |
| Hd6a                     | LOC_Os03g55389 | Protein kinase CK2                                            | flowering time                                   | development    | 11416158                           |
| PROG1                    | LOC_Os07g05900 | TF                                                            | plant architecture                               | development    | 18820699,<br>18820696,<br>23034647 |
| qPE9-1                   | LOC_Os09g26999 | keratin-associated protein                                    | plant and inflorescence architecture             | development    | 19546322                           |
| qSH1                     | LOC_Os01g62920 | TF BEL1-type homeobox gene (presumptive transcription factor) | seed shattering                                  | development    | 16614172                           |
| se5                      | LOC_Os06g40080 | chromophore protein                                           | flowering time                                   | development    | 10849355                           |
| Shattering1 -            | LOC_Os03g44710 | TF (YABBY-like)                                               | seed shattering                                  | development    | 22581231,                          |

|                  |                |                                     |                                           |                |                                 |
|------------------|----------------|-------------------------------------|-------------------------------------------|----------------|---------------------------------|
| OsSh1            |                |                                     |                                           |                | 21695282,<br>22158310           |
| shattering4      | LOC_Os04g57530 | TF (homeobox)                       | seed shattering                           | development    | 16527928                        |
| SKC1             | LOC_Os06g48810 | transporter (HKT-type)              | salt homeostasis and                      | abiotic stress | 16155566                        |
| =OsHKT1          |                |                                     | salt tolerance                            | response       |                                 |
| heavy metal      | LOC_Os07g12900 | transporter                         | metal tolerance                           | abiotic stress | 20823253                        |
| atpase3          |                |                                     |                                           | response       |                                 |
| (HMA3)           |                |                                     |                                           |                |                                 |
| Nramp            | LOC_Os02g03900 | transporter                         | metal tolerance                           | abiotic stress | 21829395                        |
| aluminum         |                |                                     |                                           | response       |                                 |
| transporter1     |                |                                     |                                           |                |                                 |
| Pi-ta            | LOC_Os12g18360 | R-protein with leucine-rich repeats | pathogen resistance                       | biotic stress  | 11090207,<br>21695282, 22158310 |
| Pi2 (Nbs4-Pi2)   | LOC_Os06g17920 | R-protein with leucine-rich repeats | pathogen resistance                       | biotic stress  | 17073304                        |
| Pi9 (= Nbs2-Pi9) | LOC_Os06g05359 | R-protein with leucine-rich repeats | pathogen resistance                       | biotic stress  | 16387888                        |
| Piz-t            | LOC_Os06g17900 | R-protein with leucine-rich repeats | pathogen resistance                       | biotic stress  | 17073304                        |
| Pi37             | LOC_Os01g57310 | R-protein with leucine-rich repeats | pathogen resistance                       | biotic stress  | 17947408                        |
| Pid3             | LOC_Os06g22460 | R-protein with leucine-rich repeats | pathogen resistance                       | biotic stress  | 21621742                        |
| Xa1              | LOC_Os04g53160 | R-protein with leucine-rich repeats | pathogen resistance                       | biotic stress  | 9465073                         |
| Xa21             | LOC_Os01g56470 | R-protein with leucine-rich repeats | pathogen resistance                       | biotic stress  | 8525370                         |
| Xa26             | LOC_Os04g13640 | R-protein with leucine-rich repeats | pathogen resistance                       | biotic stress  | 14756760                        |
| OsGA20ox1        | LOC_Os03g63970 | enzyme                              | seedling vigor                            | development    | 22481119                        |
| GRAIN            | LOC_Os04g33740 | enzyme                              | grain weight                              | development    | 18820698                        |
| INCOMPLETE       |                |                                     |                                           |                |                                 |
| FILLING 1        |                |                                     |                                           |                |                                 |
| GS5              | LOC_Os05g06660 | enzyme                              | grain size                                | development    | 22019783                        |
| GW2              | LOC_Os02g14720 | enzyme E3 ubiquitin ligase          | grain size                                | development    | 17417637                        |
| OsCKX2=Gn1a      | LOC_Os01g10110 | enzyme                              | grain yield                               | development    | 15976269                        |
| OsPPKL1/qGL3     | LOC_Os03g44500 | signal transduction                 | grain size                                | development    | 23236132                        |
| OsSPL14 / WFP    | LOC_Os08g39890 | TF                                  | grain yield                               | development    | 20495565, 20495564              |
| OsSPL16          | LOC_Os08g41940 | TF                                  | grain size and shape                      | development    | 22729225                        |
| qSW5             | LOC_Os05g09520 | unknown                             | grain size                                | development    | 18604208,<br>20972439           |
| Sd1 (=GA20ox-2)  | LOC_Os01g66100 | enzyme                              | plant stature, dwarfism                   | development    | 11961544                        |
| OsC1             | LOC_Os06g10350 | TF (R2R3-MYB)                       | plant coloration (loss of apiculus color) | other          | 15514070,<br>23034647, 20972439 |

|                                   |                |                                         |                                     |                           |                                             |
|-----------------------------------|----------------|-----------------------------------------|-------------------------------------|---------------------------|---------------------------------------------|
| Rc                                | LOC_Os07g11020 | TF (bHLH)                               | seed color                          | other                     | 17696613,<br>16399804, 20972439             |
| Waxy /GBSS                        | LOC_Os06g04200 | enzyme                                  | amylose content<br>(glutinous rice) | other                     | 7742858, 9718725,<br>9747848, 16547098      |
| Bh4                               | LOC_Os04g38660 | transporter                             | seed hull color                     | other                     | 21263038,<br>23034647                       |
| Pikm1-TS +<br>Pikm2-TS<br>cluster | LOC_Os11g46210 | R-protein with leucine-<br>rich repeats | pathogen resistance                 | biotic stress<br>response | 18940787,<br>22643901                       |
| Pikm1-TS +<br>Pikm2-TS<br>cluster | LOC_Os11g46200 | R-protein with leucine-<br>rich repeats | pathogen resistance                 | biotic stress<br>response | 18940787,<br>22643901                       |
| Pi5-1 + Pi5-2<br>cluster          | LOC_Os09g15840 | R-protein with leucine-<br>rich repeats | pathogen resistance                 | biotic stress<br>response | 19153255                                    |
| Pib                               | LOC_Os02g57310 | R-protein with leucine-<br>rich repeats | pathogen resistance                 | biotic stress<br>response | 10417726                                    |
| Hd1                               | LOC_Os06g16370 | TF CO-like                              | flowering time                      | development               | 11148291,<br>19246394,15078816,<br>19246394 |
| SaM + SaF                         | LOC_Os01g39670 | E3 Ligase + F-box                       | F1 male sterility                   | other                     | 19033192                                    |
| SaM + SaF                         | LOC_Os01g39680 | E3 Ligase + F-box                       | F1 male sterility                   | other                     | 19033192                                    |

**Supplementary Table S3 Causal gene features and their frequency and value in causal genes and the genome background**

| Category     | Feature name <sup>a</sup>                | Arabidopsis    |                |                      | Rice           |                |                      |
|--------------|------------------------------------------|----------------|----------------|----------------------|----------------|----------------|----------------------|
|              |                                          | causal<br>gene | genome<br>gene | P value <sup>b</sup> | causal<br>gene | genome<br>gene | P value <sup>b</sup> |
| Enzyme class | is_carbohydrates_metabolism              | 1.7%           | 5.0%           | 3.7E-01              | 6.7%           | 5.2%           | 5.1E-01              |
| Enzyme class | is_nucleotides_metabolism                | 0.0%           | 2.2%           | 6.4E-01              | 2.2%           | 2.5%           | 1.0E+00              |
| Enzyme class | is_energy_metabolism                     | 3.3%           | 1.9%           | 3.1E-01              | 0.0%           | 1.8%           | 1.0E+00              |
| Enzyme class | is_fatty_acids_lipids_metabolism         | 3.3%           | 2.8%           | 6.9E-01              | 0.0%           | 3.2%           | 4.0E-01              |
| Enzyme class | is_specialized_metabolism                | 5.0%           | 3.7%           | 4.8E-01              | 0.0%           | 4.4%           | 2.7E-01              |
| Enzyme class | is_cofactors_metabolism                  | 0.0%           | 2.1%           | 6.4E-01              | 2.2%           | 2.4%           | 1.0E+00              |
| Enzyme class | is_other_metabolism                      | 0.0%           | 1.3%           | 1.0E+00              | 2.2%           | 1.3%           | 4.4E-01              |
| Enzyme class | is_hormones_metabolism                   | 1.7%           | 1.2%           | 5.2E-01              | 6.7%           | 1.2%           | 1.8E-02              |
| Enzyme class | is_inorganic_nutrients_metabolism        | 8.3%           | 1.4%           | 1.7E-03              | 2.2%           | 1.9%           | 5.9E-01              |
| Enzyme class | is_detoxification_metabolism             | 0.0%           | 0.9%           | 1.0E+00              | 0.0%           | 1.1%           | 1.0E+00              |
| Enzyme class | is_redox_metabolism                      | 0.0%           | 0.7%           | 1.0E+00              | 0.0%           | 1.0%           | 1.0E+00              |
| Enzyme class | is_amino_acids_metabolism                | 1.7%           | 1.7%           | 1.0E+00              | 0.0%           | 1.9%           | 1.0E+00              |
| Enzyme class | is_macromolecule_metabolism <sup>c</sup> | 11.7%          | 12.9%          | 1.0E+00              | 44.4%          | 33.9%          | 1.6E-01              |
| GO           | is_TF                                    | 10.0%          | 6.3%           | 2.8E-01              | 13.3%          | 4.8%           | 2.0E-02              |
| GO           | is_receptor                              | 11.7%          | 0.6%           | 1.5E-07              | 0.0%           | 0.6%           | 1.0E+00              |



|                     |                                    |       |       |         |       |       |         |
|---------------------|------------------------------------|-------|-------|---------|-------|-------|---------|
| GO                  | is_kinase                          | 15.0% | 10.9% | 3.0E-01 | 17.8% | 13.3% | 3.8E-01 |
| GO                  | is_transporter                     | 20.0% | 7.9%  | 2.4E-03 | 11.1% | 7.1%  | 2.5E-01 |
| Co-function network | network_weight <sup>d</sup>        | 182.0 | 126.4 | 5.9E-02 | 11.8  | 76.5  | 1.2E-21 |
| Polymorphism        | is_start_gained                    | 56.7% | 43.0% | 3.7E-02 | 11.1% | 11.8% | 1.0E+00 |
| Polymorphism        | is_start_lost                      | 6.7%  | 7.3%  | 1.0E+00 | 0.0%  | 0.8%  | 1.0E+00 |
| Polymorphism        | is_stop_gained                     | 68.3% | 35.8% | 4.6E-07 | 11.1% | 5.4%  | 9.4E-02 |
| Polymorphism        | is_stop_lost                       | 11.7% | 8.0%  | 3.3E-01 | 4.4%  | 1.3%  | 1.2E-01 |
| Polymorphism        | is_SNP_splice_site                 | 28.3% | 19.5% | 1.0E-01 | 24.3% | 23.5% | 8.5E-01 |
| Polymorphism        | Is_SNP_cis <sup>e</sup>            | 55.0% | 72.0% | 5.7E-03 | NA    | NA    | NA      |
| Polymorphism        | is_nonsyn_deleterious <sup>f</sup> | 93.3% | 82.5% | 2.6E-02 | 40.0% | 28.7% | 1.0E-01 |
| Polymorphism        | normalized_nonsyn_SNP <sup>g</sup> | 0.159 | 0.113 | 9.1E-03 | 0.011 | 0.011 | 4.7E-01 |
| Evolution related   | is_essential_gene <sup>h</sup>     | 1.7%  | 10.0% | 2.8E-02 | 0.0%  | 8.9%  | 3.1E-02 |
| Evolution related   | paralog_copy_number                | 56.3  | 30.4  | 9.9E-07 | 118.0 | 37.0  | 1.5E-03 |

<sup>a</sup> The features with a name that starts with “is\_” are binary variables.

<sup>b</sup> Fisher’s exact test was used for all binary features. Mann-Whitney U Test was used for all continuous variables.

<sup>c</sup> This category contains genes that were annotated as enzyme by GO but not present in PMN. The majority are involved in macromolecule metabolism.

<sup>d</sup> “network\_weight” is the sum weight of all edges connected to a gene based on AraNet or RiceNet (Lee *et al.* 2010; Lee *et al.* 2011).

<sup>e</sup> “is\_SNP\_cis” indicates whether polymorphisms are present in the cis-element found in the promoter region of the gene (Weirauch *et al.* 2014). The cis-element data was available only for Arabidopsis and therefore not used in the rice model.

<sup>f</sup> “is\_nonsyn\_deleterious” indicates the presence of non-synonymous SNPs in highly conserved residues, which are likely to affect protein function (Ng and Henikoff 2003).

<sup>g</sup> The number of non-synonymous SNPs was normalized to the length of the protein.

<sup>h</sup> Essential gene prediction was based on function annotation, duplication, expression levels and patterns, rate of evolution, cross-species conservation and other information and taken from (Lloyd *et al.* 2015).

#### Supplementary Table S4 Features used for the Arabidopsis model. Known causal genes were labeled

as 1 in the ‘class’ column. Other genes were labeled as 0.

This file is available as ‘Arabidopsis\_features\_v4.csv’ at

[https://github.com/carnegie/QTG\\_Finder/tree/master/prediction/model\\_training](https://github.com/carnegie/QTG_Finder/tree/master/prediction/model_training)

#### Supplementary Table S5 Features used for the rice model. Known causal genes were labeled as 1 in the

‘class’ column. Other genes were labeled as 0.

This file is available as ‘rice\_features\_v2.csv’ at

[https://github.com/carnegie/QTG\\_Finder/tree/master/prediction/model\\_training](https://github.com/carnegie/QTG_Finder/tree/master/prediction/model_training)

#### Supplementary Table S6 Confusion matrix based on cross-validation analysis. For each cross-

validation fold, the testing data set was composed of 20% of known causal genes and randomly selected

negative genes. The average of all iterations was used. TP, true positive; FN, false negative; FP, false

positive; TN, true positive; TPR, true positive rate; TNR, true negative rate. TPR= TP/(TP+FN).

TNR=TN/(FP+TN)

---

**Arabidopsis**

---

**Confusion matrix**

**TP= 2.3**

**FP= 4.6**

FN= 9.7                      TN= 2395.1

TPR=19%                    TNR=99%

---

**Rice**

---

**Confusion matrix**

TP= 1.6                      FP= 5.1

FN= 7.4                      TN= 1749.0

TPR=18%                    TNR=99%

---

**Supplementary Table S7 The change of AUC-ROC when removing each feature.** The mean and standard deviation were calculated from 900 iterations.

|                                   | $\Delta$ AUC-ROC |       |
|-----------------------------------|------------------|-------|
|                                   | mean             | SD    |
| <b>Arabidopsis</b>                |                  |       |
| paralog_copy_number               | -0.057           | 0.007 |
| is_transporter                    | -0.037           | 0.009 |
| normalized_nonsyn_SNP             | -0.021           | 0.013 |
| is_receptor                       | -0.015           | 0.006 |
| is_TF                             | -0.013           | 0.006 |
| is_stop_gained                    | -0.006           | 0.013 |
| is_energy_metabolism              | -0.006           | 0.007 |
| network_weight                    | -0.004           | 0.003 |
| is_macromolecule_metabolism       | -0.003           | 0.005 |
| is_inorganic_nutrients_metabolism | -0.003           | 0.005 |
| is_nucleotides_metabolism         | -0.003           | 0.002 |
| is_essential_gene                 | -0.001           | 0.004 |
| is_hormones_metabolism            | -0.001           | 0.003 |
| is_detoxification_metabolism      | 0.000            | 0.003 |
| is_amino_acids_metabolism         | 0.001            | 0.003 |
| is_nonsyn_deleterious             | 0.001            | 0.003 |
| is_start_lost                     | 0.001            | 0.002 |
| is_redox_metabolism               | 0.002            | 0.002 |
| is_cofactors_metabolism           | 0.002            | 0.003 |
| is_specialized_metabolism         | 0.002            | 0.003 |
| is_kinase                         | 0.002            | 0.003 |
| is_start_gained                   | 0.003            | 0.003 |
| is_carbohydrates_metabolism       | 0.003            | 0.003 |
| is_splice_site_SNP                | 0.004            | 0.002 |
| is_other_metabolism               | 0.004            | 0.002 |
| is_stop_lost                      | 0.007            | 0.003 |
| is_fatty_acids_lipids_metabolism  | 0.010            | 0.003 |
| is_SNP_cis                        | 0.015            | 0.006 |
| <b>Rice</b>                       |                  |       |
| paralog_copy_number               | -0.051           | 0.013 |
| is_macromolecule_metabolism       | -0.046           | 0.007 |
| network_weight                    | -0.042           | 0.012 |
| is_TF                             | -0.029           | 0.005 |
| is_transporter                    | -0.015           | 0.005 |
| is_stop_gained                    | -0.012           | 0.008 |
| normalized_nonsyn_SNP             | -0.009           | 0.019 |
| is_carbohydrates_metabolism       | -0.007           | 0.011 |
| is_start_lost                     | -0.004           | 0.003 |
| is_specialized_metabolism         | -0.002           | 0.006 |
| is_kinase                         | -0.002           | 0.004 |
| is_essential_gene                 | 0.000            | 0.003 |
| is_hormones_metabolism            | 0.000            | 0.003 |

|                                   |       |       |
|-----------------------------------|-------|-------|
| is_energy_metabolism              | 0.000 | 0.003 |
| is_stop_lost                      | 0.001 | 0.002 |
| is_amino_acids_metabolism         | 0.001 | 0.003 |
| is_nucleotides_metabolism         | 0.001 | 0.004 |
| is_other_metabolism               | 0.002 | 0.003 |
| is_detoxification_metabolism      | 0.003 | 0.003 |
| is_nonsyn_deleterious             | 0.003 | 0.005 |
| is_fatty_acids_lipids_metabolism  | 0.004 | 0.003 |
| is_cofactors_metabolism           | 0.004 | 0.004 |
| is_receptor                       | 0.004 | 0.003 |
| is_splice_site_SNP                | 0.005 | 0.003 |
| is_redox_metabolism               | 0.005 | 0.003 |
| is_inorganic_nutrients_metabolism | 0.006 | 0.004 |
| is_start_gained                   | 0.012 | 0.005 |

**Supplementary Table S8 Evaluating model performance based on the rank of an independent set of known causal genes.**

| QTL trait                   | Gene name        | Rank in a QTL <sup>a</sup> | Evidence code <sup>b</sup> | Reference                                                                                     |
|-----------------------------|------------------|----------------------------|----------------------------|-----------------------------------------------------------------------------------------------|
| <b>Arabidopsis</b>          |                  |                            |                            |                                                                                               |
| Seed size                   | <i>AHK3</i>      | 1/366 (<0.1%)              | G                          | Guo <i>et al.</i> , 2016<br>Riefler <i>et al.</i> , 2006                                      |
| Seed size                   | <i>AHK2</i>      | 2/293 (<0.1%)              | G                          | Guo <i>et al.</i> , 2016<br>Riefler <i>et al.</i> , 2006                                      |
| Stem branching              | <i>MAX3</i>      | 17/457 (3%)                | G, J                       | Huang <i>et al.</i> , 2013<br>Ehrenreich <i>et al.</i> , 2007<br>Bennett <i>et al.</i> , 2006 |
| Insect resistance           | <i>TGG2</i>      | 31/496 (6%)                | G, J                       | Pfalz <i>et al.</i> , 2007<br>Barth <i>et al.</i> , 2006                                      |
| Insect resistance           | <i>TGG1</i>      | 38/496 (7%)                | G, J                       | Pfalz <i>et al.</i> , 2007<br>Barth <i>et al.</i> , 2006                                      |
| Insect resistance           | <i>GSOH1</i>     | 15/104 (13%)               | C, E, G                    | Hansen <i>et al.</i> , 2008                                                                   |
| Seed germination            | <i>FBA2</i>      | 23/111 (19%)               | G                          | Yuan <i>et al.</i> , 2016                                                                     |
| Stem branching              | <i>AGL6</i>      | 106/457 (22%)              | C, G, H                    | Huang <i>et al.</i> , 2012                                                                    |
| Fructose content in leaves  | <i>Sweet17</i>   | 47/186 (24%)               | C, F, G                    | Fabien <i>et al.</i> , 2013                                                                   |
| Seed germination            | <i>AZF2</i>      | 38/111 (33%)               | G                          | Yuan <i>et al.</i> , 2016                                                                     |
| Shoot regeneration          | <i>RPK1</i>      | 282/554 (50%)              | H, G, J                    | Motte <i>et al.</i> , 2014                                                                    |
| <b>Rice</b>                 |                  |                            |                            |                                                                                               |
| Blast resistance            | Pi35/Pish        | 3/203 (0.5%)               | C, G, H                    | Fukuoka <i>et al.</i> , 2014                                                                  |
| Blast resistance            | Pi-k             | 10/444 (2%)                | E, C, G                    | Sharma <i>et al.</i> , 2005<br>Azizi <i>et al.</i> , 2016<br>Rai <i>et al.</i> , 2011         |
| Leaf blade width            | nal1             | 7/210 (2%)                 | C, G                       | Qi <i>et al.</i> , 2008                                                                       |
| Drought response            | <i>OsAH</i>      | 10/474 (2%)                | F, G                       | Dixit <i>et al.</i> , 2015                                                                    |
| Drought response            | <i>OsARF</i>     | 12/474 (3%)                | F, G                       | Dixit <i>et al.</i> , 2015                                                                    |
| Drought response            | <i>OsWAK125</i>  | 27/474 (6%)                | F, G                       | Dixit <i>et al.</i> , 2015                                                                    |
| Grain chalkiness            | <i>qACE9</i>     | 9/120 (6%)                 | F, E                       | Gao <i>et al.</i> , 2016                                                                      |
| Drought response            | <i>OsACF</i>     | 34/474 (7%)                | F, G                       | Dixit <i>et al.</i> , 2015                                                                    |
| Drought response            | <i>OsGDP</i>     | 43/474 (8%)                | F, G                       | Dixit <i>et al.</i> , 2015                                                                    |
| Drought response            | <i>OsPOLEI19</i> | 50/474 (11%)               | F, G                       | Dixit <i>et al.</i> , 2015                                                                    |
| Drought response            | <i>OsNAM</i>     | 51/474 (11%)               | C, F, G                    | Dixit <i>et al.</i> , 2015                                                                    |
| Plant height                | osh15            | 14/117 (11%)               | F, G                       | Fan <i>et al.</i> , 2016<br>Sato <i>et al.</i> , 1999                                         |
| Heading time                | Hd3a             | 102/730 (13%)              | F, G                       | Monne <i>et al.</i> , 2002<br>Itoh <i>et al.</i> , 2010                                       |
| Drought response            | <i>OsCESA10</i>  | 56/474 (14%)               | F, G                       | Dixit <i>et al.</i> , 2015                                                                    |
| Grain color                 | kala4            | 15/62 (22%)                | F, G                       | Oikawa <i>et al.</i> , 2015                                                                   |
| Tiller number               | ts1              | 54/175 (30%)               | F, E                       | Liu <i>et al.</i> , 2017                                                                      |
| Bacterial blight resistance | <i>WRKY13</i>    | 171/460 (36%)              | G                          | Hu <i>et al.</i> , 2008<br>Qiu <i>et al.</i> , 2007                                           |
| Blast and bacterial blight  | UROD             | 19/38 (47%)                | F                          | Zeng <i>et al.</i> , 2013                                                                     |

## lesion

---

<sup>a</sup> The numerator is the rank of the causal gene. The denominator is the total number of genes in the QTL region. The percentage in parentheses indicates rank percentile.

<sup>b</sup> Evidence code: C, functional complementation; E, association between the allelic status and expression of the gene; F, fine mapping; G, genetic analyses; H, haplotype analyses showing the association between the trait and polymorphisms of the gene. J, joint linkage-association analyses

# Supplementary Figures

A

Arabidopsis

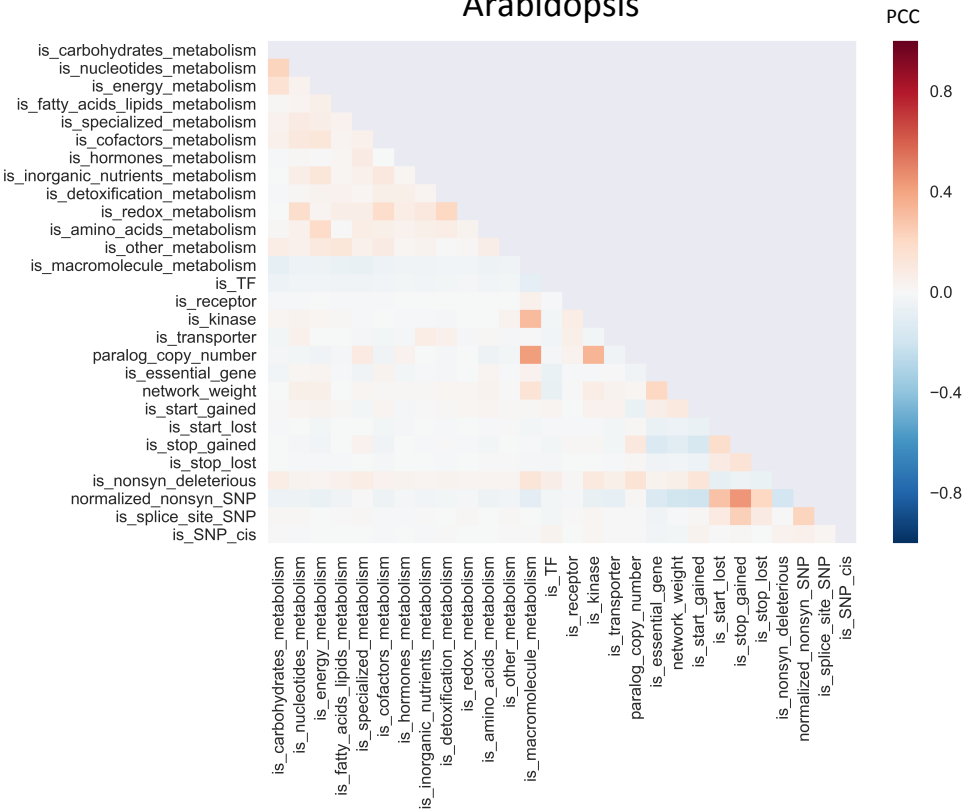

B

Rice

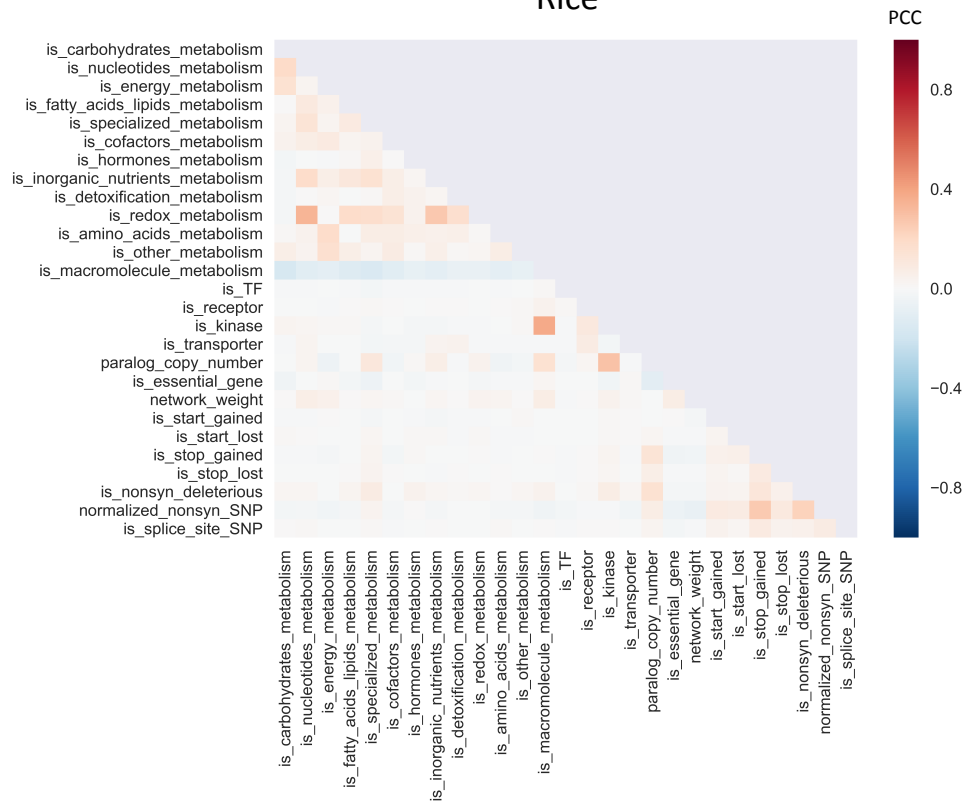

**Supplementary Figure S1** Correlations among features. Pearson's correlation coefficients (PCC) were used for the heatmap. (A) Arabidopsis (B) rice

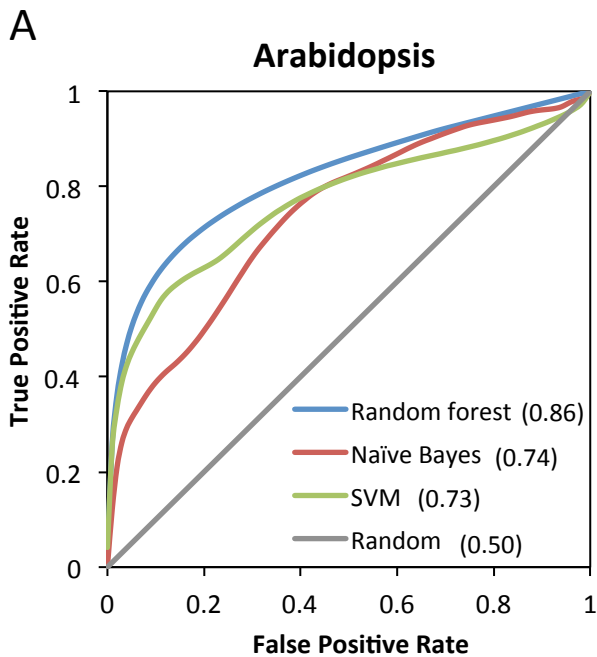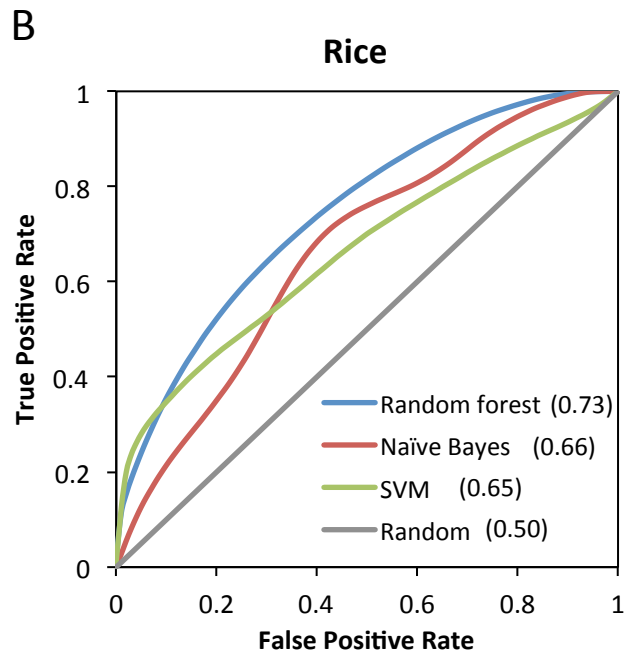

**Supplementary Figure S2** Comparing ROC curves of classifiers. ROC curves were based on cross-validation. Numbers in parentheses indicate Area Under the Curve (AUC). Grey diagonal lines indicate the expected training performance of a model based on random guessing. (A) Arabidopsis (B) rice

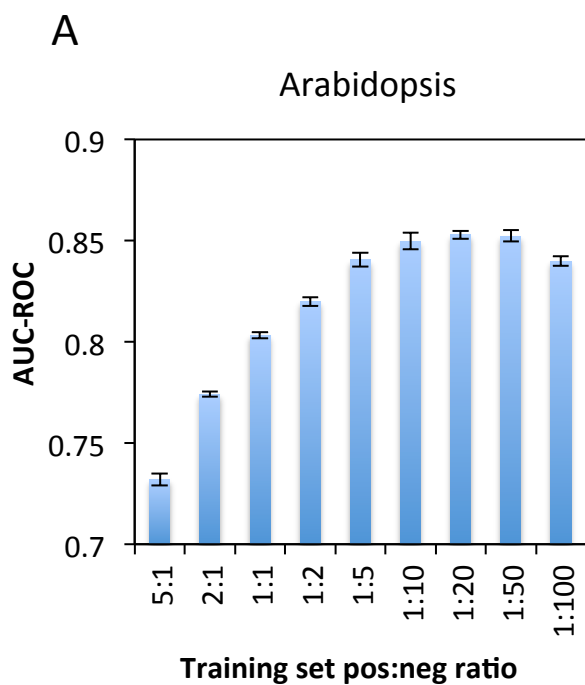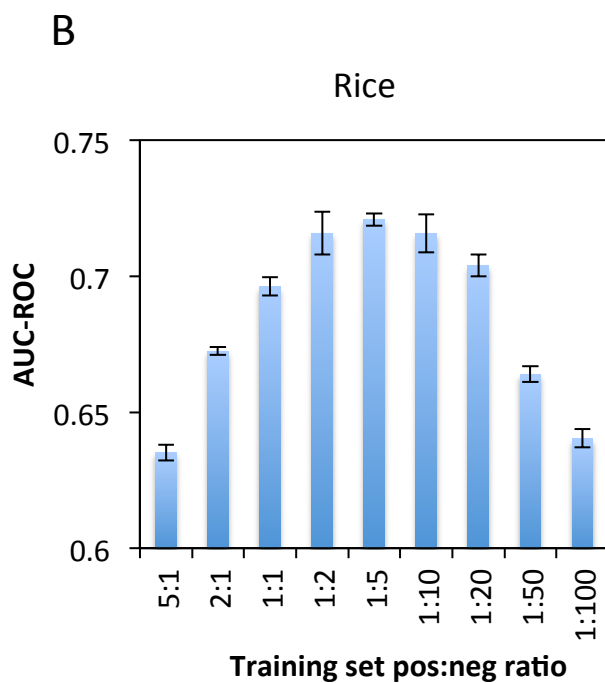

**Supplementary Figure S3** The ratio of positives:negatives in the training set. Area Under the Curve of ROC (AUC-ROC) were based on cross-validation. Error bars indicate standard deviation. (A) Arabidopsis (B) rice

A

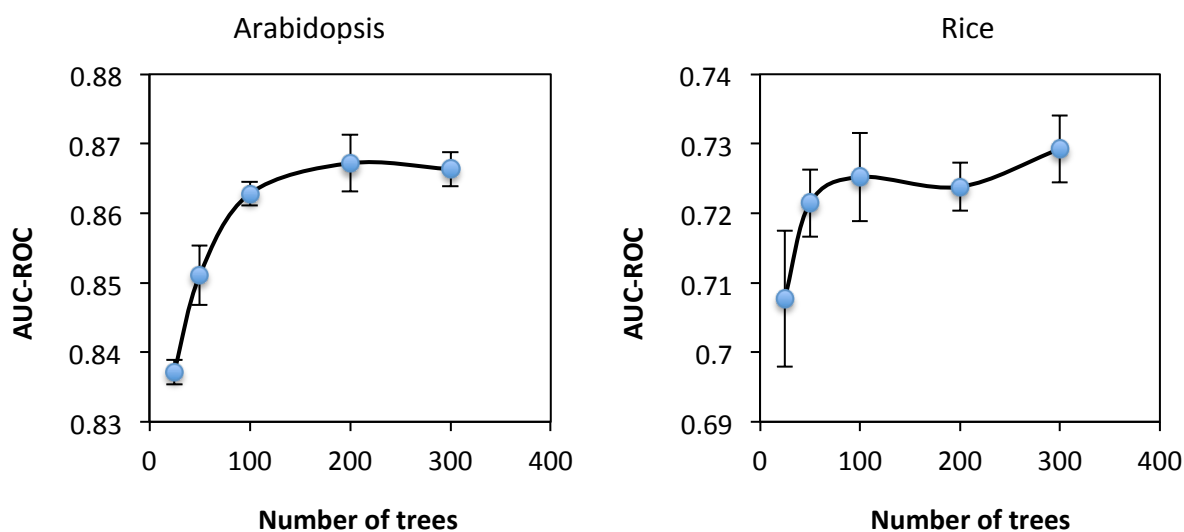

B

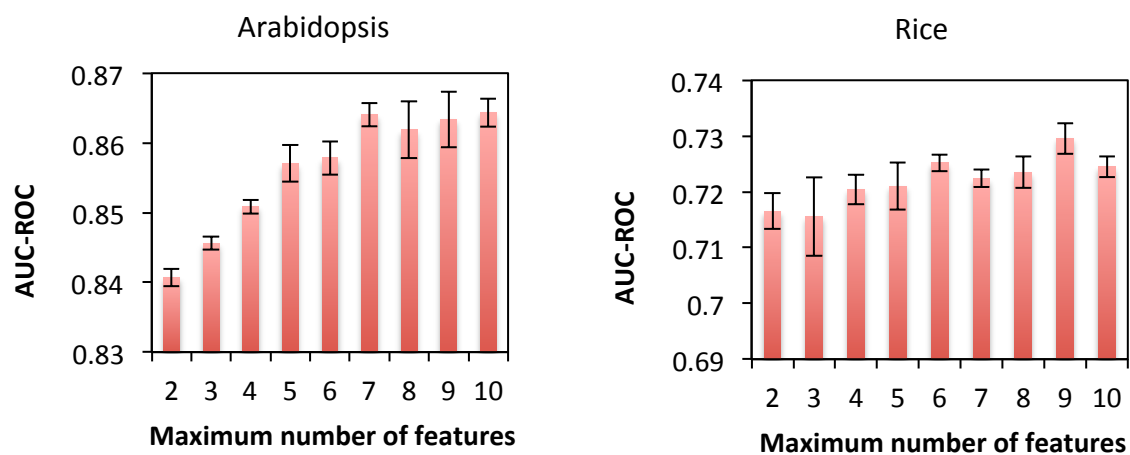

**Supplementary Figure S4** Random forest parameters. Area Under the Curve of ROC (AUC-ROC) were based on cross-validation. Error bars indicate standard deviation. (A) Number of trees in the forest (B) The maximum number of features to consider when looking for the best split.



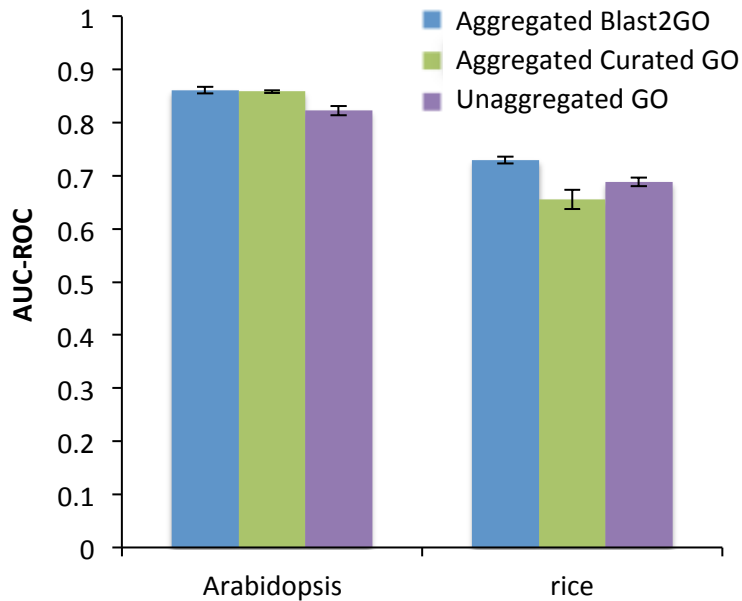

**Supplementary Figure S5** Different methods for generating GO features. Area Under the Curve of ROC (AUC-ROC) were based on cross-validation. Aggregated Blast2GO: using high-level Blast2GO for GO annotation. Aggregated Curated GO: using high-level GOs downloaded from AmiGO (<http://current.geneontology.org/products/pages/downloads.html>). Unaggregated GO: using all fine-grained molecular function GOs as features without converting to higher-level GOs.

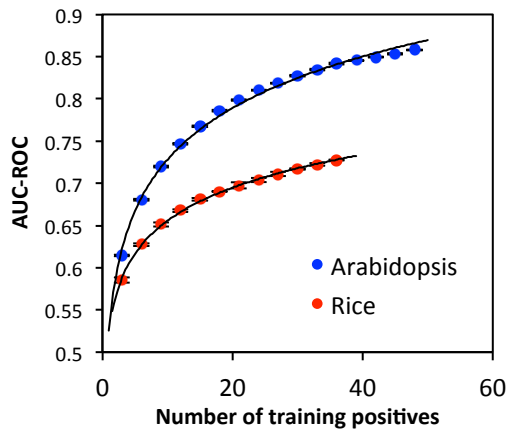

**Supplementary Figure S6** The relationship between training performance and the number of training positives used. The cross-validation framework was applied to training sets with different number of training positives. The number of training negatives was adjusted to maintain the same positive:negative ratio in all training sets. One fifth of known causal genes were retained as testing positive to calculate AUC-ROC.

## References

- Azizi, P., M.Y. Rafii, S.N.A. Abdullah, M.M. Hanafi, M. Maziah *et al.*, 2016 Over-Expression of the *Pikh* Gene with a CaMV 35S Promoter Leads to Improved Blast Disease (*Magnaporthe oryzae*) Tolerance in Rice. *Frontiers in Plant Science* 7:773.
- Barth, C., and G. Jander, 2006 Arabidopsis myrosinases TGG1 and TGG2 have redundant function in glucosinolate breakdown and insect defense. *Plant J.* 46 (4):549-562.
- Bennett, T., T. Sieberer, B. Willett, J. Booker, C. Luschnig *et al.*, 2006 The Arabidopsis MAX pathway controls shoot branching by regulating auxin transport. *Current Biology* 16 (6):553-563.
- Chardon, F., M. Bedu, F. Calenge, Patrick A.W. Klemens, L. Spinner *et al.*, 2013 Leaf Fructose Content Is Controlled by the Vacuolar Transporter SWEET17 in Arabidopsis. *Current Biology* 23 (8):697-702.
- Conte, G.L., M.E. Arnegard, J. Best, Y.F. Chan, F.C. Jones *et al.*, 2015 Extent of QTL Reuse During Repeated Phenotypic Divergence of Sympatric Threespine Stickleback. *Genetics* 201 (3):1189-1200.
- Dixit, S., A. Kumar Biswal, A. Min, A. Henry, R.H. Oane *et al.*, 2015 Action of multiple intra-QTL genes concerted around a co-localized transcription factor underpins a large effect QTL. *Sci. Rep.* 5:15183.
- Ehrenreich, I.M., P.A. Stafford, and M.D. Purugganan, 2007 The genetic architecture of shoot branching in Arabidopsis thaliana: A comparative assessment of candidate gene associations vs. quantitative trait locus mapping. *Genetics* 176 (2):1223-1236.
- Fan, S.X., X.Y. Yao, J. Liu, X.Y. Dong, T. Mao *et al.*, 2016 Characterization and fine mapping of osh15(t), a novel dwarf mutant gene in rice (*Oryza sativa* L.). *Genes Genom* 38 (9):849-856.
- Fukuoka, S., S.-I. Yamamoto, R. Mizobuchi, U. Yamanouchi, K. Ono *et al.*, 2014 Multiple functional polymorphisms in a single disease resistance gene in rice enhance durable resistance to blast. *Sci. Rep.* 4:4550.
- Gao, Y., C.L. Liu, Y.Y. Li, A.P. Zhang, G.J. Dong *et al.*, 2016 QTL analysis for chalkiness of rice and fine mapping of a candidate gene for qACE9. *Rice* 9:41.
- Guo, J., J. Fan, B.A. Hauser, and S.Y. Rhee, 2015 Target Enrichment Improves Mapping of Complex Traits by Deep Sequencing. *G3-Genes Genomes Genetics* 6 (1):67-77.
- Hu, K.M., D.Y. Qiu, X.L. Shen, X.H. Li, and S.P. Wang, 2008 Isolation and manipulation of quantitative trait loci for disease resistance in rice using a candidate gene approach. *Mol. Plant.* 1 (5):786-793.
- Huang, X., S. Effgen, R.C. Meyer, K. Theres, and M. Koornneef, 2012 Epistatic natural allelic variation reveals a function of AGAMOUS-LIKE6 in axillary bud formation in Arabidopsis. *Plant Cell* 24 (6):2364-2379.
- Itoh, H., Y. Nonoue, M. Yano, and T. Izawa, 2010 A pair of floral regulators sets critical day length for Hd3a florigen expression in rice. *Nat Genet* 42 (7):635-638.

- Lee, I., B. Ambaru, P. Thakkar, E.M. Marcotte, and S.Y. Rhee, 2010 Rational association of genes with traits using a genome-scale gene network for *Arabidopsis thaliana*. *Nat. Biotechnol.* 28 (2):149-U114.
- Lee, I., Y.S. Seo, D. Coltrane, S. Hwang, T. Oh *et al.*, 2011 Genetic dissection of the biotic stress response using a genome-scale gene network for rice. *Proc. Natl. Acad. Sci. U. S. A.* 108 (45):18548-18553.
- Liu, L., F. Meng, Y. He, M. Zhu, Y. Shen *et al.*, 2017 Fine Mapping and Candidate Gene Analysis of the Tiller Suppression Gene *ts1* in Rice. *Plos One* 12 (1).
- Lloyd, J.P., A.E. Seddon, G.D. Moghe, M.C. Simenc, and S.-H. Shiu, 2015 Characteristics of Plant Essential Genes Allow for within- and between-Species Prediction of Lethal Mutant Phenotypes. *Plant Cell* 27 (8):2133-2147.
- Martin, A., and V. Orgogozo, 2013 The Loci of repeated evolution: a catalog of genetic hotspots of phenotypic variation. *Evolution* 67 (5):1235-1250.
- Motte, H., A. Vercauteren, S. Depuydt, S. Landschoot, D. Geelen *et al.*, 2014 Combining linkage and association mapping identifies RECEPTOR-LIKE PROTEIN KINASE1 as an essential *Arabidopsis* shoot regeneration gene. *Proc. Natl. Acad. Sci. U. S. A.* 111 (22):8305-8310.
- Ng, P.C., and S. Henikoff, 2003 SIFT: predicting amino acid changes that affect protein function. *Nucleic Acids Res.* 31 (13):3812-3814.
- Oikawa, T., H. Maeda, T. Oguchi, T. Yamaguchi, N. Tanabe *et al.*, 2015 The Birth of a Black Rice Gene and Its Local Spread by Introgression. *Plant Cell* 27 (9):2401-2414.
- Qi, J., Q. Qian, Q. Bu, S. Li, Q. Chen *et al.*, 2008 Mutation of the Rice *Narrow leaf1* Gene, Which Encodes a Novel Protein, Affects Vein Patterning and Polar Auxin Transport. *Plant Physiol* 147 (4):1947-1959.
- Qiu, D., J. Xiao, X. Ding, M. Xiong, M. Cai *et al.*, 2007 OsWRKY13 mediates rice disease resistance by regulating defense-related genes in salicylate- and jasmonate-dependent signaling. *Mol Plant Microbe Interact* 20 (5):492-499.
- Rai, A., S. Pal Kumar, S. Gupta, N. Gautam, N. Kumar Singh *et al.*, 2011 Functional complementation of rice blast resistance gene *Pik h* (Pi54) conferring resistance to diverse strains of *Magnaporthe oryzae*. *J. Plant Biochem. Biotechnol.* 20 (1):55-65.
- Riefler, M., O. Novak, M. Strnad, and T. Schmulling, 2006 *Arabidopsis* cytokinin receptor mutants reveal functions in shoot growth, leaf senescence, seed size, germination, root development, and cytokinin metabolism. *Plant Cell* 18 (1):40-54.
- Sato, Y., N. Sentoku, Y. Miura, H. Hirochika, H. Kitano *et al.*, 1999 Loss-of-function mutations in the rice homeobox gene *OSH15* affect the architecture of internodes resulting in dwarf plants. *EMBO J* 18 (4):992-1002.
- Sharma, T.R., M.S. Madhav, B.K. Singh, P. Shanker, T.K. Jana *et al.*, 2005 High-resolution mapping, cloning and molecular characterization of the *Pi-k(h)* supercript stop gene of rice, which confers resistance to *Magnaporthe grisea*. *Mol. Genet. Genomics* 274 (6):569-578.

- Weirauch, M.T., A. Yang, M. Albu, A.G. Cote, A. Montenegro-Montero *et al.*, 2014 Determination and Inference of Eukaryotic Transcription Factor Sequence Specificity. *Cell* 158 (6):1431-1443.
- Yuan, W., J.M. Flowers, D.J. Sahraie, I.M. Ehrenreich, and M.D. Purugganan, 2016 Extreme QTL mapping of germination speed in *Arabidopsis thaliana*. *Mol. Ecol.* 25 (17):4177-4196.
- Zeng, Y.X., L.Y. Ma, Z.J. Ji, Z.H. Wen, X.M. Li *et al.*, 2013 Fine mapping and candidate gene analysis of LM3, a novel lesion mimic gene in rice. *Biologia* 68 (1):82-90.
